# Supplementary material
Source: publisher figshare collection journal article supplement (https://frontiersin.figshare.com/ndownloader/files/11472710)
Supplement: Supplementary file [file 11472710]

## Appendix 1

In this file are contained clinical data of the single patients of our cohort, in order to help to understand the peculiarities of the disease onset and the progressive evolution of the clinical phenotype during a long-term follow-up. Please note that the difference between clinical profile at presentation and at diagnosis derives from the long time between the disease onset and the diagnosis of pSLE.

### Patient 1

Age at onset: 15 years

Clinical presentation: Gastroenteritis, malar rash, photosensitivity

Time to diagnosis: 17 months

Duration of follow-up: 4 years

| Clinical feature           | Diagnosis | 1 Year | 3 Years |
|----------------------------|-----------|--------|---------|
| Acute cutaneous SLE        | X         | X      | X       |
| Malar Rash                 |           |        |         |
| Photosensitivity           | X         | X      | X       |
| Articular Involvement      | X         | X      | X       |
| Renal Involvement          |           |        |         |
| Neurolupus                 |           |        |         |
| Haematological Involvement | X         | X      | X       |
| Haemolytic Anemia          | X         |        |         |
| Leukopenia                 | X         | X      | X       |
| Thrombocytopenia           |           |        |         |

**Patient 2**

Age at onset: 15 years

Clinical presentation: Photosensitivity, malar rash

Time to diagnosis: 11 months

Duration of follow-up: 30 years

| Clinical feature           | Diagnosis | 1 Year | 3 Years | 5 Years | 10 Years  |
|----------------------------|-----------|--------|---------|---------|-----------|
| Acute cutaneous SLE        | X         |        |         |         |           |
| Malar Rash                 | X         |        |         |         |           |
| Photosensitivity           |           |        |         |         |           |
| Articular Involvement      | X         | X      |         |         | X         |
| Renal Involvement          |           | X      | X       | X       | X         |
| Neurolupus                 |           |        |         |         |           |
| Haematological Involvement | X         | X      |         | X       | X         |
| Haemolytic Anemia          |           |        |         |         |           |
| Leukopenia                 | X         | X      |         | X       | X         |
| Thrombocytopenia           |           |        |         |         |           |
| Other                      |           |        |         |         | Pleuritis |

**Patient 3**

Age at onset: 16 years

Clinical presentation: Arthritis

Time to diagnosis: 2 months

Duration of follow-up: 4 years

| Clinical feature           | Diagnosis | 1 Year | 3 Years |
|----------------------------|-----------|--------|---------|
| Acute cutaneous SLE        | X         | X      |         |
| Malar Rash                 | X         | X      |         |
| Photosensitivity           | X         | X      |         |
| Articular Involvement      | X         | X      | X       |
| Renal Involvement          |           | X      |         |
| Neurolupus                 |           |        |         |
| Haematological Involvement |           |        |         |
| Haemolytic Anemia          |           |        |         |
| Leukopenia                 |           |        |         |
| Thrombocytopenia           |           |        |         |

**Patient 4**

Age at onset: 17

Clinical presentation: Pleuritis, Pericarditis

Time to diagnosis: 1 month

Duration of follow-up: 7 years

| Clinical feature                  | Diagnosis           | 1 Year | 3 Years             | 5 Years   |
|-----------------------------------|---------------------|--------|---------------------|-----------|
| <b>Acute cutaneous SLE</b>        |                     |        |                     |           |
| <b>Malar Rash</b>                 |                     |        |                     |           |
| <b>Photosensitivity</b>           |                     |        |                     |           |
| <b>Articular Involvement</b>      |                     |        |                     |           |
|                                   |                     |        |                     |           |
|                                   |                     |        |                     |           |
|                                   |                     |        |                     |           |
| <b>Renal Involvement</b>          |                     |        |                     |           |
|                                   | X                   | X      | X                   | X         |
| <b>Neurolupus</b>                 |                     |        |                     |           |
|                                   |                     |        |                     |           |
| <b>Haematological Involvement</b> |                     |        |                     |           |
|                                   |                     |        |                     |           |
| <b>Haemolytic Anemia</b>          |                     |        |                     |           |
|                                   |                     |        |                     |           |
| <b>Leukopenia</b>                 |                     |        |                     |           |
|                                   | X                   | X      | X                   |           |
| <b>Thrombocytopenia</b>           |                     |        |                     |           |
|                                   |                     |        |                     |           |
| <b>Other</b>                      |                     |        |                     |           |
|                                   | Pleuro-pericarditis |        | Pleuro-pericarditis | Pleuritis |

**Patient 5**

Age at onset: 15 years

Clinical presentation: Thrombocytopenia

Time to diagnosis: 62 months

Duration of follow-up: 4 years

| Clinical feature           | Diagnosis | 1 Year | 3 Years |
|----------------------------|-----------|--------|---------|
| Acute cutaneous SLE        | X         | X      | X       |
| Malar Rash                 | X         |        | X       |
| Photosensitivity           | X         | X      | X       |
| Articular Involvement      |           |        |         |
| Renal Involvement          |           |        |         |
| Neurolupus                 |           |        |         |
| Haematological Involvement | X         | X      | X       |
| Haemolytic Anemia          |           |        |         |
| Leukopenia                 |           |        |         |
| Thrombocytopenia           | X         | X      | X       |

**Patient 6**

Age at onset: 14

Clinical presentation: Nephritis, malar rash, photosensitivity

Time to diagnosis: 0 months

Duration of follow-up: 24 years

| Clinical feature           | Diagnosis | 1 Year | 3 Years    | 5 Years | 10 Years   |
|----------------------------|-----------|--------|------------|---------|------------|
| Acute cutaneous SLE        | X         | X      | X          | X       |            |
| Malar Rash                 | X         | X      | X          | X       |            |
| Photosensitivity           | X         | X      |            | X       |            |
| Articular Involvement      |           |        |            |         |            |
| Renal Involvement          | X         | X      | X          | X       | X          |
| Neurolupus                 |           |        |            |         | X          |
| Haematological Involvement |           |        |            |         |            |
| Haemolytic Anemia          |           |        |            |         |            |
| Leukopenia                 |           |        |            |         |            |
| Thrombocytopenia           |           |        |            |         |            |
| Other                      |           |        | Vasculitis |         | Vasculitis |

**Patient 7**

Age at onset: 15 years

Clinical presentation: Arthritis, proteinuria, malar rash, cytopenia

Time to diagnosis: 0 months

Duration of follow-up: 24 years

| Clinical feature           | Diagnosis | 1 Year | 3 Years | 5 Years | 10 Years |
|----------------------------|-----------|--------|---------|---------|----------|
| Acute cutaneous SLE        | X         |        |         |         |          |
| Malar Rash                 | X         |        |         |         |          |
| Photosensitivity           |           |        |         |         |          |
| Articular Involvement      | X         |        |         |         |          |
| Renal Involvement          | X         | X      | X       | X       | X        |
| Neurolupus                 |           |        |         |         | X        |
| Haematological Involvement | X         | X      | X       | X       | X        |
| Haemolytic Anemia          |           |        |         |         |          |
| Leukopenia                 | X         |        |         |         |          |
| Thrombocytopenia           | X         | X      | X       | X       | X        |

**Patient 8**

Age at onset: 14 years

Clinical presentation: Malar rash, arthritis

Time to diagnosis: 0 months

Duration of follow-up: 17 years

| Clinical feature           | Diagnosis | 1 Year | 3 Years             | 5 Years | 10 Years |
|----------------------------|-----------|--------|---------------------|---------|----------|
| Acute cutaneous SLE        | X         |        |                     |         |          |
| Malar Rash                 | X         |        |                     |         |          |
| Photosensitivity           |           |        |                     |         |          |
| Articular Involvement      | X         |        |                     |         |          |
| Renal Involvement          |           |        |                     | X       | X        |
| Neurolupus                 |           |        |                     |         |          |
| Haematological Involvement |           |        |                     |         |          |
| Haemolytic Anemia          |           |        |                     |         |          |
| Leukopenia                 |           |        |                     |         |          |
| Thrombocytopenia           |           |        |                     |         |          |
| Other                      |           |        | Pleuro-pericarditis |         |          |



**Patient 9**

Age at onset: 13 years

Clinical presentation: Malar rash

Time to diagnosis: 12 months

Duration of follow-up: 10 years

| Clinical feature           | Diagnosis | 1 Year | 3 Years | 5 Years | 10 Years |
|----------------------------|-----------|--------|---------|---------|----------|
| Acute cutaneous SLE        | X         | X      | X       | X       | X        |
| Malar Rash                 | X         | X      | X       | X       | X        |
| Photosensitivity           | X         | X      |         | X       | X        |
| Articular Involvement      |           | X      |         | X       | X        |
| Renal Involvement          |           |        | X       | X       | X        |
| Neurolupus                 |           |        |         |         |          |
| Haematological Involvement |           |        |         | X       | X        |
| Haemolytic Anemia          |           |        |         |         |          |
| Leukopenia                 |           |        |         | X       | X        |
| Thrombocytopenia           |           |        |         |         |          |

**Patient 10**

Age at onset: 16 years

Clinical presentation: Arthritis, Raynaud's phenomenon

Time to diagnosis: 26 months

Duration of follow-up: 19 years

| Clinical feature           | Diagnosis | 1 Year | 3 Years | 5 Years | 10 Years |
|----------------------------|-----------|--------|---------|---------|----------|
| Acute cutaneous SLE        |           |        |         |         |          |
| Malar Rash                 |           |        |         |         |          |
| Photosensitivity           |           |        |         |         |          |
| Articular Involvement      | X         | X      | X       | X       |          |
| Renal Involvement          |           |        |         |         | X        |
| Neurolupus                 |           |        |         |         | X        |
| Haematological Involvement |           |        |         |         |          |
| Haemolytic Anemia          |           |        |         |         |          |
| Leukopenia                 |           |        |         |         |          |
| Thrombocytopenia           |           |        |         |         |          |

**Patient 11**

Age at onset: 12 years

Clinical presentation: malar rash

Time to diagnosis: 6 months

Duration of follow-up: not available (too recently diagnosed)

| Clinical feature           | Diagnosis |
|----------------------------|-----------|
| Acute cutaneous SLE        | X         |
| Malar Rash                 | X         |
| Photosensitivity           | X         |
| Articular Involvement      | X         |
| Renal Involvement          |           |
| Neurolupus                 |           |
| Haematological Involvement |           |
| Haemolytic Anemia          |           |
| Leukopenia                 |           |
| Thrombocytopenia           |           |

**Patient 12**

Age at onset: 17 years

Clinical presentation: Arthritis, photosensitivity

Time to diagnosis: 0 months

Duration of follow-up: 5 years

| Clinical feature           | Diagnosis | 1 Year | 3 Years | 5 Years |
|----------------------------|-----------|--------|---------|---------|
| Acute cutaneous SLE        | X         | X      | X       | X       |
| Malar Rash                 |           |        |         |         |
| Photosensitivity           | X         | X      | X       | X       |
| Articular Involvement      | X         |        | X       | X       |
| Renal Involvement          |           |        |         |         |
| Neurolupus                 |           |        |         |         |
| Haematological Involvement | X         | X      |         |         |
| Haemolytic Anemia          |           |        |         |         |
| Leukopenia                 | X         | X      |         |         |
| Thrombocytopenia           |           |        |         |         |

**Patient 13**

Age at onset: 15 years

Clinical presentation: Renal involvement

Time to diagnosis: 2 months

Duration of follow-up: 11 years

| Clinical feature           | Diagnosis | 1 Year | 3 Years | 5 Years | 10 Years |
|----------------------------|-----------|--------|---------|---------|----------|
| Acute cutaneous SLE        |           |        |         |         |          |
| Malar Rash                 |           |        |         |         |          |
| Photosensitivity           |           |        |         |         |          |
| Articular Involvement      |           |        |         |         |          |
| Renal Involvement          | X         | X      | X       | X       | X        |
| Neurolupus                 |           |        |         |         |          |
| Haematological Involvement |           |        |         | X       | X        |
| Haemolytic Anemia          |           |        |         |         |          |
| Leukopenia                 |           |        |         |         |          |
| Thrombocytopenia           |           |        |         | X       | X        |

**Patient 14**

Age at onset: 14 years

Clinical presentation: Arthritis, Raynaud's phenomenon

Time to diagnosis: 12 months

Duration of follow-up: 15 years

| Clinical feature           | Diagnosis | 1 Year | 3 Years | 5 Years | 10 Years   |
|----------------------------|-----------|--------|---------|---------|------------|
| Acute cutaneous SLE        | X         |        |         |         |            |
| Malar Rash                 |           |        |         |         |            |
| Photosensitivity           | X         |        |         |         |            |
| Articular Involvement      | X         |        |         |         |            |
| Renal Involvement          |           |        |         |         |            |
| Neurolupus                 |           |        |         |         |            |
| Haematological Involvement | X         | X      | X       | X       | X          |
| Haemolytic Anemia          |           |        |         |         |            |
| Leukopenia                 | X         | X      | X       | X       | X          |
| Thrombocytopenia           |           |        |         |         |            |
| Other                      |           |        |         |         | Vasculitis |

**Patient 15**

Age at onset: 17 years

Clinical presentation: Arthritis, cytopenia

Time to diagnosis: 0 months

Duration of follow-up: 16 years

| Clinical feature                  | Diagnosis | 1 Year | 3 Years | 5 Years | 10 Years |
|-----------------------------------|-----------|--------|---------|---------|----------|
| <b>Acute cutaneous SLE</b>        |           |        |         |         |          |
| <b>Malar Rash</b>                 |           |        |         |         |          |
| <b>Photosensitivity</b>           |           |        |         |         |          |
| <b>Articular Involvement</b>      | X         |        |         |         | X        |
| <b>Renal Involvement</b>          |           | X      | X       | X       | X        |
| <b>Neurolupus</b>                 |           |        |         |         |          |
| <b>Haematological Involvement</b> | X         | X      | X       | X       | X        |
| <b>Haemolytic Anemia</b>          | X         | X      |         |         |          |
| <b>Leukopenia</b>                 | X         |        | X       | X       |          |
| <b>Thrombocytopenia</b>           |           |        |         |         | X        |

**Patient 16**

Age at onset: 15 years

Clinical presentation: Thrombocytopenia

Time to diagnosis: 67 months

Duration of follow-up: 10 years

| Clinical feature           | Diagnosis | 1 Year | 3 Years | 5 Years    | 10 Years   |
|----------------------------|-----------|--------|---------|------------|------------|
| Acute cutaneous SLE        |           |        |         |            |            |
| Malar Rash                 |           |        |         |            |            |
| Photosensitivity           |           |        |         |            |            |
| Articular Involvement      |           |        | X       |            |            |
| Renal Involvement          | X         |        |         |            | X          |
| Neurolupus                 |           |        |         |            |            |
| Haematological Involvement | X         | X      | X       | X          | X          |
| Haemolytic Anemia          |           |        |         |            |            |
| Leukopenia                 | X         |        | X       |            |            |
| Thrombocytopenia           | X         | X      | X       | X          | X          |
| Other                      |           |        |         | Vasculitis | Vasculitis |



**Patient 17**

Age at onset: 15 years  
Clinical presentation: Arthritis, renal involvement  
Time to diagnosis: 34 months  
Duration of follow-up: 13 years

| Clinical feature           | Diagnosis | 1 Year | 3 Years | 5 Years | 10 Years |
|----------------------------|-----------|--------|---------|---------|----------|
| Acute cutaneous SLE        |           |        | X       |         | X        |
| Malar Rash                 |           |        | X       |         | X        |
| Photosensitivity           |           |        | X       |         | X        |
| Articular Involvement      | X         |        | X       |         |          |
| Renal Involvement          | X         | X      | X       | X       | X        |
| Neurolupus                 |           |        |         |         |          |
| Haematological Involvement |           | X      | X       | X       | X        |
| Haemolytic Anemia          |           | X      | X       | X       | X        |
| Leukopenia                 |           |        |         |         |          |
| Thrombocytopenia           |           |        |         |         |          |

**Patient 18**

Age at onset: 13 years

Clinical presentation: Thrombocytopenia

Time to diagnosis: 52 months

Duration of follow-up: 15 years

| Clinical feature           | Diagnosis | 1 Year | 3 Years | 5 Years | 10 Years |
|----------------------------|-----------|--------|---------|---------|----------|
| Acute cutaneous SLE        | X         |        |         |         |          |
| Malar Rash                 | X         |        |         |         |          |
| Photosensitivity           |           |        |         |         |          |
| Articular Involvement      | X         |        |         |         |          |
| Renal Involvement          | X         | X      | X       | X       | X        |
| Neurolupus                 |           |        |         |         |          |
| Haematological Involvement | X         |        |         |         |          |
| Haemolytic Anemia          |           |        |         |         |          |
| Leukopenia                 |           |        |         |         |          |
| Thrombocytopenia           | X         |        |         |         |          |

**Patient 19**

Age at onset: 16 years

Clinical presentation: Arthritis

Time to diagnosis: 10 months

Duration of follow-up: 10 years

| Clinical feature           | Diagnosis | 1 Year | 3 Years | 5 Years | 10 Years |
|----------------------------|-----------|--------|---------|---------|----------|
| Acute cutaneous SLE        | X         | X      |         |         |          |
| Malar Rash                 | X         | X      |         |         |          |
| Photosensitivity           |           |        |         |         |          |
| Articular Involvement      | X         |        |         |         |          |
| Renal Involvement          |           | X      | X       | X       | X        |
| Neurolupus                 |           |        |         |         |          |
| Haematological Involvement | X         |        |         |         |          |
| Haemolytic Anemia          | X         |        |         |         |          |
| Leukopenia                 | X         |        |         |         |          |
| Thrombocytopenia           | X         |        |         |         |          |

**Patient 20**

Age at onset: 15 years

Clinical presentation: Malar rash

Time to diagnosis: 0 months

Duration of follow-up: 26 years

| Clinical feature           | Diagnosis | 1 Year | 3 Years | 5 Years | 10 Years |
|----------------------------|-----------|--------|---------|---------|----------|
| Acute cutaneous SLE        | X         | X      | X       | X       | X        |
| Malar Rash                 | X         | X      | X       | X       | X        |
| Photosensitivity           | X         | X      | X       | X       |          |
| Articular Involvement      |           |        |         |         |          |
| Renal Involvement          |           |        |         |         |          |
| Neurolupus                 |           |        |         |         |          |
| Haematological Involvement |           |        |         |         |          |
| Haemolytic Anemia          |           |        |         |         |          |
| Leukopenia                 |           |        |         |         |          |
| Thrombocytopenia           |           |        |         |         |          |

**Patient 21**

Age at onset: 15 years

Clinical presentation: Malar rash, xerostomia, xerophtalmia

Time to diagnosis: 86 months

Duration of follow-up: 10 years

| Clinical feature           | Diagnosis | 1 Year | 3 Years | 5 Years | 10 Years |
|----------------------------|-----------|--------|---------|---------|----------|
| Acute cutaneous SLE        | X         |        |         | X       | X        |
| Malar Rash                 | X         |        |         | X       | X        |
| Photosensitivity           | X         |        |         | X       |          |
| Articular Involvement      |           |        |         |         |          |
| Renal Involvement          |           |        |         |         |          |
| Neurolupus                 |           |        |         |         |          |
| Haematological Involvement | X         |        |         |         | X        |
| Haemolytic Anemia          |           |        |         |         |          |
| Leukopenia                 |           |        |         |         |          |
| Thrombocytopenia           | X         |        |         |         | X        |

**Patient 22**

Age at onset: 14 years  
Clinical presentation: Arthritis, cytopenia  
Time to diagnosis: 0 months  
Duration of follow-up: 18 years

| Clinical feature           | Diagnosis | 1 Year | 3 Years | 5 Years | 10 Years |
|----------------------------|-----------|--------|---------|---------|----------|
| Acute cutaneous SLE        |           |        |         |         |          |
| Malar Rash                 |           |        |         |         |          |
| Photosensitivity           |           |        |         |         |          |
| Articular Involvement      | X         |        |         |         |          |
| Renal Involvement          |           | X      |         | X       | X        |
| Neurolupus                 |           | X      | X       | X       |          |
| Haematological Involvement | X         |        |         |         | X        |
| Haemolytic Anemia          | X         |        |         |         |          |
| Leukopenia                 | X         |        |         |         |          |
| Thrombocytopenia           |           |        |         |         | X        |

**Patient 23**

Age at onset: 11 years

Clinical presentation: Haemolytic anemia

Time to diagnosis: 35 months

Duration of follow-up: 3 years

| Clinical feature           | Diagnosis | 1 Year | 3 Years |
|----------------------------|-----------|--------|---------|
| Acute cutaneous SLE        |           |        |         |
| Malar Rash                 |           |        |         |
| Photosensitivity           |           |        |         |
| Articular Involvement      |           |        |         |
| Renal Involvement          | X         | X      | X       |
| Neurolupus                 |           |        |         |
| Haematological Involvement | X         |        |         |
| Haemolytic Anemia          | X         |        |         |
| Leukopenia                 |           |        |         |
| Thrombocytopenia           |           |        |         |

**Patient 24**

Age at onset: 15 years

Clinical presentation: Deep venous thrombosis, arthritis

Time to diagnosis: 0 months

Duration of follow-up: 28 years

| Clinical feature           | Diagnosis | 1 Year | 3 Years | 5 Years | 10 Years |
|----------------------------|-----------|--------|---------|---------|----------|
| Acute cutaneous SLE        |           | X      |         | X       |          |
| Malar Rash                 |           |        |         | X       |          |
| Photosensitivity           |           | X      |         | X       |          |
| Articular Involvement      | X         | X      |         |         |          |
| Renal Involvement          |           |        |         |         |          |
| Neurolupus                 |           | X      |         | X       | X        |
| Haematological Involvement | X         | X      |         |         |          |
| Haemolytic Anemia          | X         |        |         |         |          |
| Leukopenia                 |           |        |         |         |          |
| Thrombocytopenia           | X         | X      |         |         |          |



**Patient 25**

Age at onset: 11,5 years

Clinical presentation: Malar rash, arthritis, renal involvement

Time to diagnosis: 1 month

Duration of follow-up: 17 years

| Clinical feature           | Diagnosis    | 1 Year | 3 Years | 5 Years | 10 Years |
|----------------------------|--------------|--------|---------|---------|----------|
| Acute cutaneous SLE        | X            |        |         |         |          |
| Malar Rash                 | X            |        |         |         |          |
| Photosensitivity           |              |        |         |         |          |
| Articular Involvement      | X            |        |         |         | X        |
| Renal Involvement          | X            |        |         |         |          |
| Neurolupus                 |              |        |         |         |          |
| Haematological Involvement |              |        |         |         | X        |
| Haemolytic Anemia          |              |        |         |         |          |
| Leukopenia                 |              |        |         |         | X        |
| Thrombocytopenia           |              |        |         |         |          |
| Other                      | Pericarditis |        |         |         |          |
